# Supplementary material for: Geographic Disparity in Son Preference among Indian Women: A Spatially Explicit District-Level Analysis
Source: Research Square preprint supplement (doi:10.21203/rs.3.rs-8742691/v1), 2026-02-24
Supplement: Supplementary file 1 [file 9c8385d4250f53e095df1f16.docx]

**Geographic Disparity in Son Preference among Indian Women: A Spatially Explicit District-Level Analysis**

**Appendix**

**Table S1:** Geographically Weighted Regression Results for Son Preference in India.

| Background characteristics | Residual | AIC | R2 Adjusted |
| --- | --- | --- | --- |
| Women age | | | |
| Age 15-24 | 33224.44 | 4768.57 | 0.461 |
| Age 25-34 | 46464.14 | 4988.98 | 0.258 |
| Age 35+ | 40208.12 | 4884.54 | 0.359 |
| Education | | | |
| No education | 22938.7 | 4506.29 | 0.628 |
| Primary | 36395.88 | 4833.31 | 0.41 |
| Secondary | 30157.52 | 4694.16 | 0.514 |
| Higher | 34964.57 | 4805.2 | 0.432 |
| Marriage | | | |
| Less than 18 | 34273.91 | 4789.43 | 0.445 |
| 18 - 24 | 38523.33 | 4848.5 | 0.384 |
| More than 25 | 35944.54 | 4822.42 | 0.418 |
| First birth | | | |
| Less than 20 | 37872.44 | 4860.61 | 0.386 |
| 20 - 29 | 42216.41 | 4926.75 | 0.322 |
| 30 -49 | 37758.89 | 4857.5 | 0.389 |
| BMI | | | |
| Normal | 35711.05 | 4820.76 | 0.42 |
| Underweight | 37127.29 | 4846.64 | 0.398 |
| overweight | 34089.08 | 4787.09 | 0.447 |
| Maternal height | | | |
| Short | 36089.81 | 4825.93 | 0.415 |
| Medium | 42261.17 | 4920.53 | 0.326 |
| Tall | 37608.32 | 4841.71 | 0.398 |
| Family planning | | | |
| Not expose | 33856.8 | 4783.93 | 0.45 |
| Expose | 39683.94 | 4877.62 | 0.366 |
| Parity | | | |
| 0 | 31467.24 | 4711.65 | 0.498 |
| 1 | 39309.54 | 4866.03 | 0.375 |
| 2 | 29596.09 | 4685.52 | 0.521 |
| 3 | 23484.34 | 4522.53 | 0.619 |
| Contraceptive use | | | |
| No use | 39515.37 | 4879.94 | 0.366 |
| Modern use | 36745.34 | 4839.74 | 0.404 |
| Traditional | 38146.02 | 4865.66 | 0.382 |
| Mass media | | | |
| No | 23205.23 | 4514.31 | 0.624 |
| Any | 23205.23 | 4514.31 | 0.624 |
| Health facility | | | |
| No problem | 34677.15 | 4797.94 | 0.438 |
| Problem | 34988.01 | 4803.16 | 0.434 |
| Wealth index | | | |
| Poorest | 32279.3 | 4747.56 | 0.477 |
| Poorer | 35849.37 | 4823.94 | 0.418 |
| Middle | 39405.43 | 4890.43 | 0.36 |
| Richer | 35866.71 | 4823.6 | 0.418 |
| Richest | 34213.18 | 4789.41 | 0.445 |
| Household Member | | | |
| 01_04 | 30793.12 | 4714.5 | 0.501 |
| 05_08 | 34394.43 | 4776.74 | 0.451 |
| More than 8 | 36988.01 | 4843.92 | 0.401 |
| Household head | | | |
| Male | 46458.71 | 4982.45 | 0.263 |
| Female | 35841.77 | 4821.5 | 0.419 |
| Social caste | | | |
| SC/ST | 37297.92 | 4851.92 | 0.39 |
| OBC | 35903.88 | 4824.51 | 0.418 |
| Others | 35904.88 | 4823.82 | 0.418 |
| Religion | | | |
| Hindu | 38404.57 | 4871.39 | 0.377 |
| Muslim | 36048.16 | 4825.72 | 0.416 |
| Others | 37970.58 | 4861.27 | 0.386 |
| Resident | | | |
| Urban | 37115.54 | 4847.48 | 0.398 |
| Rural | 41113.53 | 4907.37 | 0.341 |
